# Supplementary material for: Curcumin Promotes KLF5 Proteasome Degradation through Downregulating YAP/TAZ in Bladder Cancer Cells
Source: PubMed Central journal article supplement (PMC4200832; doi:10.3390/ijms150915173), 2014-08-28

## Supplementary Information

**Figure S1.** mRNA expression of KLF5-related E3 ubiquitin ligases WWP1, FBW7 and SMURF2 in 5637 and WH cells after curcumin treatment. Cells were treated with 0, 10 or 20  $\mu$ M curcumin for 12 h; then, the mRNA expressions of WWP1, FBW7 and SMURF2 were determined by real-time qPCR assay.

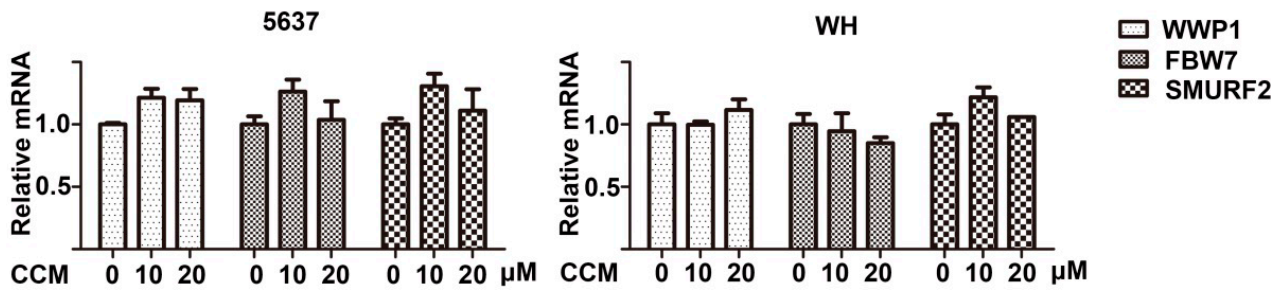

Supplement: ijms-15-15173-s001.pdf [file ijms-15-15173-s001.pdf]
